# Supplementary material for: Cyclodextrin-functionalized hollow carbon nanospheres by introducing nanogold for enhanced electrochemical sensing of o-dihydroxybenzene and p-dihydroxybenzene
Source: Royal Society of Chemistry journal article supplement (doi:10.1039/c4tb01576b), 2014-11-11
Supplement: c4tb01576b1.pdf [file c4tb01576b1.pdf]

## Supporting Information

### **Cyclodextrins functionalized hollow carbon nanospheres by introducing nanogold for enhanced electrochemical sensing of o-dihydroxybenzene and p-dihydroxybenzene**

Gangbing Zhu <sup>a,\*</sup>, Yinhui Yi <sup>a</sup>, Heng Sun <sup>a</sup>, Kun Wang <sup>b,\*</sup>, Zhixiang Han <sup>a</sup>, Xiangyang Wu <sup>a,\*</sup>

<sup>a</sup> School of the Environment and Safety Engineering, Jiangsu University, Zhenjiang, 212013, P. R.China

<sup>b</sup> School of Chemistry and Chemical Engineering, Jiangsu University, Zhenjiang 212013, P. R. China

---

\* E-mail address: zhgb1030@ujs.edu.cn (G. Zhu); wangkun@ujs.edu.cn (K. Wang); wuxy@ujs.edu.cn (X. Wu).

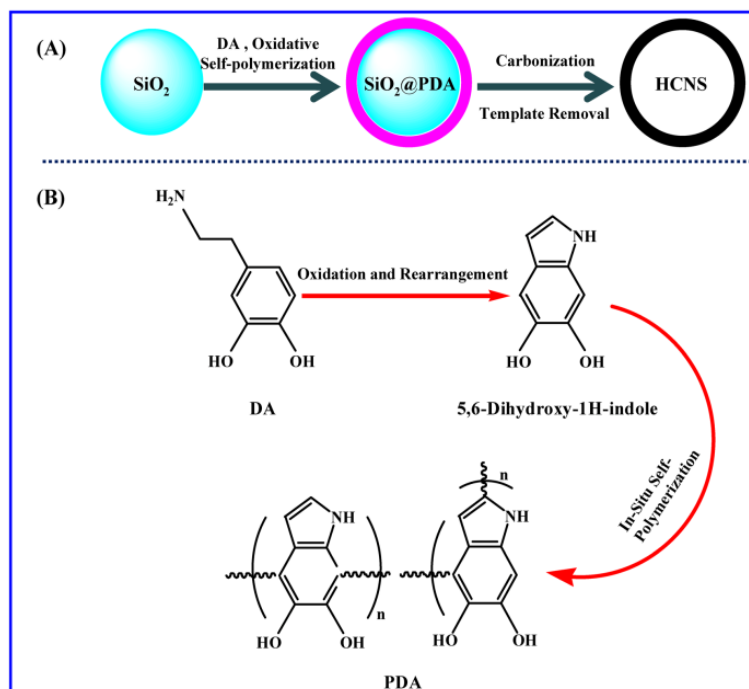

**Scheme S1.** The mechanisms for preparing HCNS (A) and oxidative polymerization of DA (B).

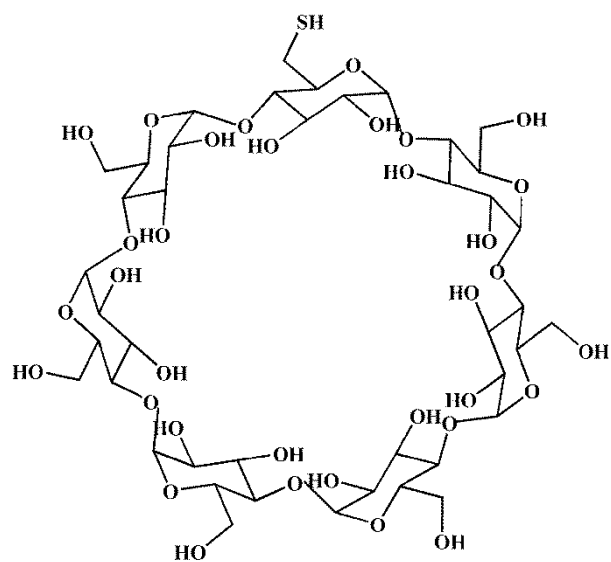

**Figure S1.** The structure of CD.
